# Supplementary material for: An ultra-fast, self-powered and flexible visible-light photodetector based on graphene/Cu2O/Cu gradient heterostructures
Source: Royal Society of Chemistry journal article supplement (doi:10.1039/d0tc05248e), 2021-01-01
Supplement: d0tc05248e1.pdf [file d0tc05248e1.pdf]

# Ultra-fast, self-powered and flexible visible-light photodetector based on graphene/Cu<sub>2</sub>O/Cu gradient heterostructures

Lujia Cong; Haitao Zhou; Mingzhu Chen; Hongbin Wang; He Chen; Jiangang Ma\*; Siyi Yan;

Bingsheng Li; Haiyang Xu; Yichun Liu

Key Laboratory of UV-Emitting Materials and Technology, Ministry of Education, Northeast Normal University, Changchun 130024, PR China

\*corresponding authors:

Jiangang Ma: [majg@nenu.edu.cn](mailto:majg@nenu.edu.cn)

## Supporting Information

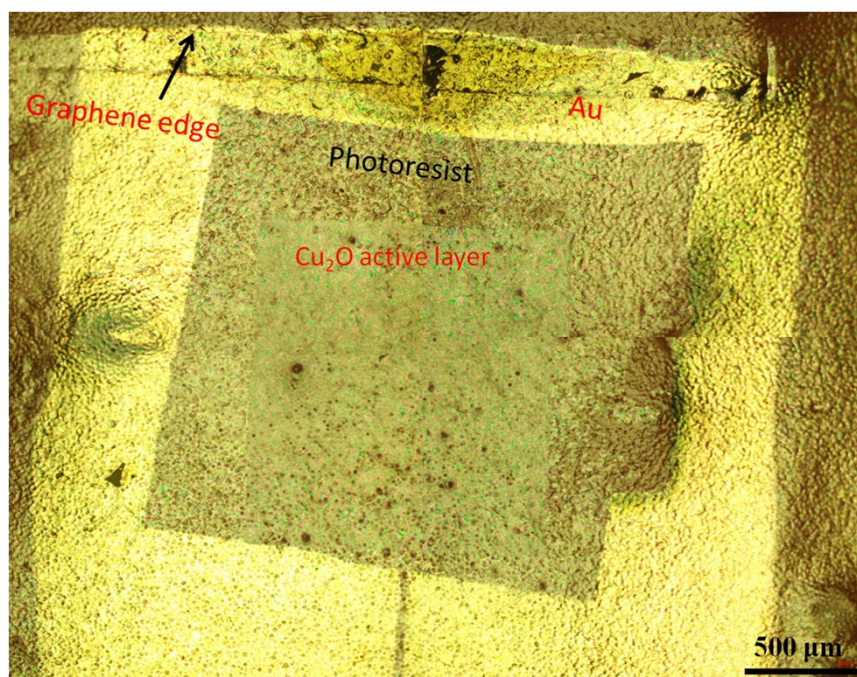

**Figure S1.** Microscope picture of graphene/Cu<sub>2</sub>O/Cu device

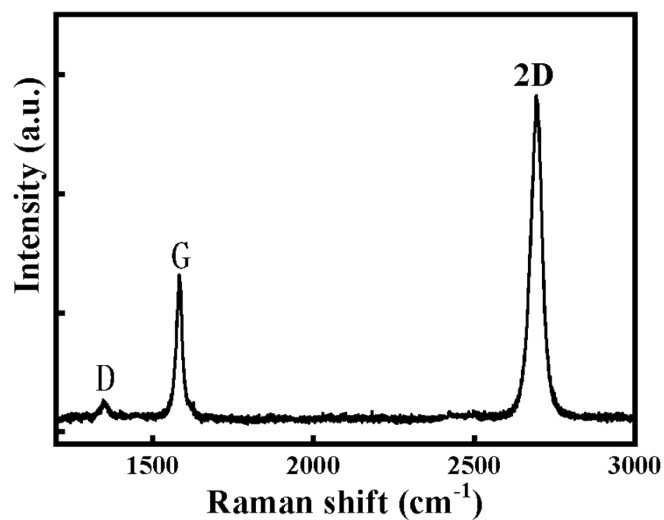

**Figure S2.** The Raman spectrum of the graphene electrode on sapphire substrate

Figure S2 shows the Raman spectrum of graphene transferred to a sapphire substrate. The weaker peak is the D band. The two stronger peaks represent the G band and the 2D band respectively. The intensity ratio of 2D to G bands ( $I_{2D}/I_G$ ) was about 2, indicating the graphene film is most likely monolayer. In addition, the value of  $I_D/I_G$  is about 0.15, indicating that the structural defect density was relatively low in the graphene film [1].

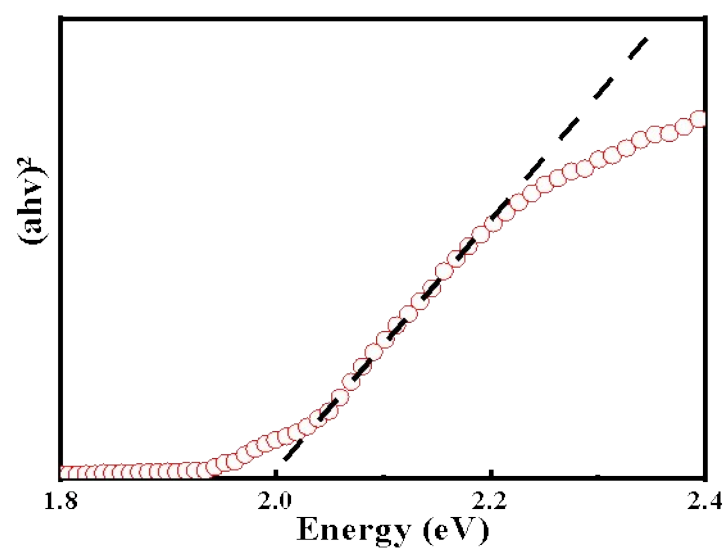

**Figure S3.** The band gap diagram of  $\text{Cu}_2\text{O}$

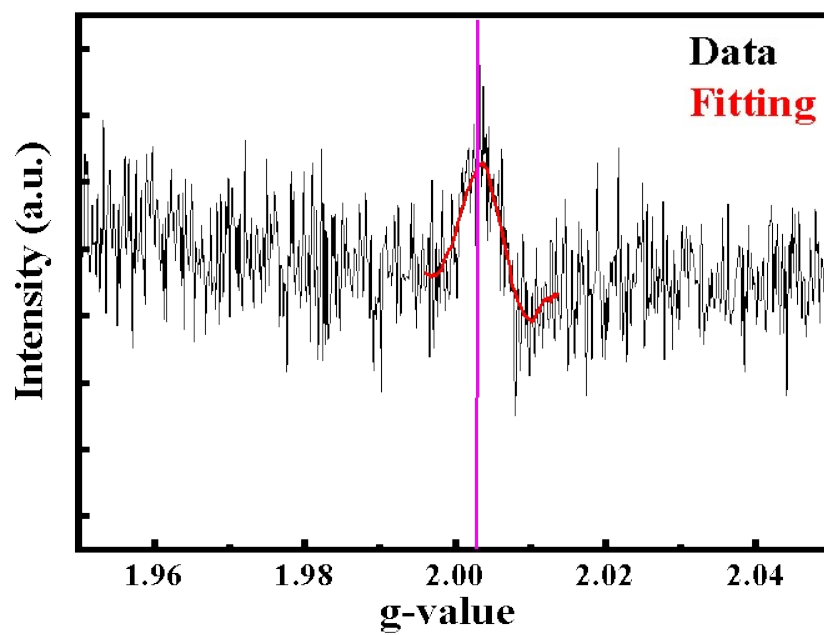

**Figure S4.** ESR spectra of  $\text{Cu}/\text{Cu}_2\text{O}$  film

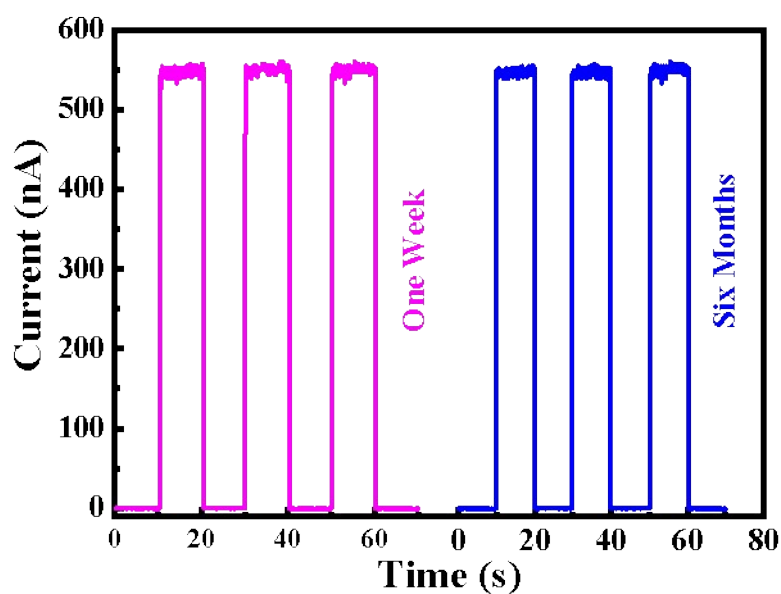

**Figure S5** The stability test of the graphene/Cu<sub>2</sub>O/Cu photodetector

Figure S5 shows the response to 550 nm light at zero bias voltage after 6 month storage in ambient without packaging. The responsivity remains almost the same value as before, indicating that the graphene/Cu<sub>2</sub>O/Cu photodetector has very good stability.

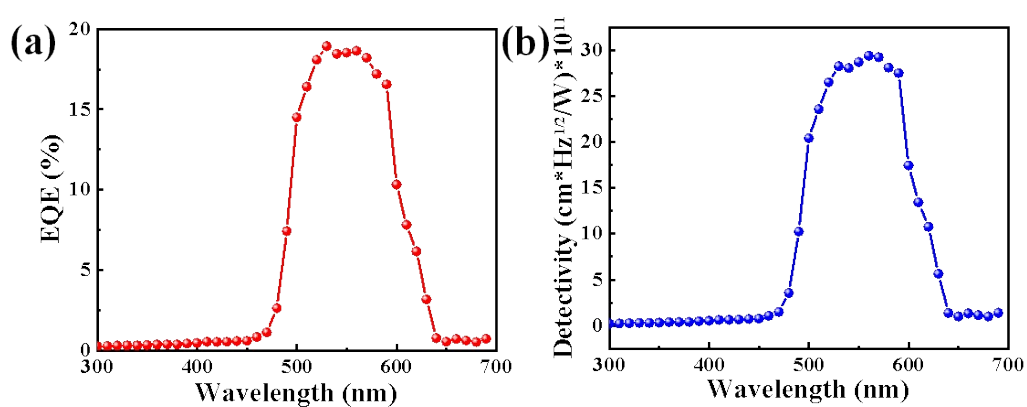

**Figure S6** The external quantum efficiency (EQE) and detectivity ( $D^*$ ) of the graphene/Cu<sub>2</sub>O/Cu photodetector

## REFERENCES

- [1]. M. D. S. L. Wimalananda, J.-K. Kim, and J.-M. Lee, “Effect of annealing dependent surface free energy change of Cu foil during graphene growth on quality of monolayer continuous graphene,” *Carbon* **108**, 127–134 (2016).
